1 Aspirin-triggered resolvin D1 reduces parasitic cardiac load by  
2 decreasing inflammation through N-formyl peptide receptor 2 in a  
3 chronic murine model of Chagas disease

4 Short title: Aspirin-triggered resolvin D1 in Chagas disease

5 Ileana Carrillo<sup>1</sup>, Rayane Rabelo<sup>2,3</sup>, César Barbosa<sup>2</sup>, Mariana Rates<sup>2</sup>, Sebastián  
6 Fuentes-Retamal<sup>1</sup>, Fabiola González-Herrera<sup>1</sup>, Daniela Guzmán-Rivera<sup>1,4</sup>, Helena  
7 Quintero<sup>1</sup>, Ulrike Kemmerling<sup>5</sup>, Christian Castillo<sup>6</sup>, Fabiana S. Machado<sup>2,3</sup>, Guillermo  
8 Díaz-Araya<sup>7\*</sup>, Juan D. Maya<sup>1\*</sup>

9 <sup>1</sup>Programa de Farmacología Molecular y Clínica, ICBM, Facultad de Medicina,  
10 Universidad de Chile, Santiago, Chile

11

12 <sup>2</sup>Laboratório de Imunorregulação de Doenças Infecciosas, Departamento de Bioquímica e  
13 Imunologia, ICB, Universidade Federal de Minas Gerais, Belo Horizonte, Brazil

14

15 <sup>3</sup> Programa em Ciências da Saúde, Doenças Infecciosas e Medicina Tropical/ Laboratório  
16 Interdisciplinar de Investigação Médica, Faculdade de Medicina, Universidade Federal de  
17 Minas Gerais, Belo Horizonte, MG, Brazil

18

19 <sup>4</sup>Escuela de Farmacia, Facultad de Medicina, Universidad Andrés Bello, Santiago, Chile

20

21 <sup>5</sup>Programa de Anatomía y Biología del Desarrollo, ICBM, Facultad de Medicina,  
22 Universidad de Chile, Santiago, Chile

23

24 <sup>6</sup>Facultad de Medicina Veterinaria y Agronomía, Universidad de Las Américas, Santiago,  
25 Chile

26

27 <sup>7</sup> Departamento de Farmacología Química y Toxicología, Facultad de Ciencias Químicas y  
28 Farmacéuticas, Universidad de Chile, Santiago, Chile

29

30

31 \*Corresponding authors

32 E-mail: [jdmaya@uchile.cl](mailto:jdmaya@uchile.cl) (JDM); [gadiaz@ciq.uchile.cl](mailto:gadiaz@ciq.uchile.cl) (GD)

33 **ABSTRACT**

34 Chagas disease, caused by the protozoan *Trypanosoma cruzi*, is endemic in Latin America and is  
35 widely distributed worldwide because of migration. After years of infection and in the absence of  
36 treatment, the disease progresses from an acute and asymptomatic phase to a chronic inflammatory  
37 cardiomyopathy, leading to heart failure and death. An inadequate balance in the inflammatory  
38 response is involved in the progression of chronic Chagas cardiomyopathy. Current therapeutic  
39 strategies cannot prevent or reverse the heart damage caused by the parasite. Aspirin-triggered  
40 resolvin D1 (AT-RvD1) is a pro-resolving mediator of inflammation that acts through N-formyl  
41 peptide receptor 2 (FPR2). AT-RvD1 participates in the modification of cytokine production,  
42 inhibition of leukocyte recruitment and efferocytosis, macrophage switching to a nonphlogistic  
43 phenotype, and the promotion of healing, thus restoring organ function. In the present study, AT-  
44 RvD1 is proposed as a potential therapy aid to regulate the pro-inflammatory state during the  
45 chronic phase of Chagas disease. C57BL/6 wild-type and FPR2 knock-out mice chronically  
46 infected with *T. cruzi* were treated for 20 days with 5 µg/kg/day AT-RvD1, 30 mg/kg/day  
47 benznidazole, or the combination of 5 µg/kg/day AT-RvD1 and 5 mg/kg/day benznidazole. At the  
48 end of treatment, changes in the immune response, cardiac tissue damage, and parasite load were  
49 evaluated. The administration of AT-RvD1 in the chronic phase of *T. cruzi* infection regulated the  
50 inflammatory response both at the systemic level and in the cardiac tissue, and it reduced cellular  
51 infiltrates, cardiomyocyte hypertrophy, fibrosis, and the parasite load in the heart tissue. Thus, AT-  
52 RvD1 was shown to be an attractive therapeutic due to its regulatory effect on the inflammatory  
53 response at the cardiac level and its ability to reduce the parasite load during chronic *T. cruzi*  
54 infection, thereby preventing the chronic cardiac damage induced by the parasite.

55

56

57 **Author Summary:**

58 Chagas disease is prevalent in Latin America and is widely distributed worldwide due to migration.  
59 If the parasite is left untreated, the disease progresses from an acute symptomless phase to chronic  
60 myocardial inflammation, which can cause heart failure and death years after infection. Imbalances  
61 in the inflammatory response are related to this progression. Current treatments cannot prevent or  
62 reverse the cardiac damage produced by the parasite. Aspirin-triggered resolvin D1, also named  
63 AT-RvD1, can modify cellular and humoral inflammatory responses leading to the resolution of  
64 inflammation, thus promoting healing and restoring organ function. In this study, AT-RvD1, in an  
65 N-formyl peptide receptor 2 (FPR2)-dependent manner, was shown to regulate local and systemic  
66 inflammation and decrease cellular infiltration in the heart tissue of mice chronically infected with  
67 the parasite and reduce cardiac hypertrophy and fibrosis. Importantly, AT-RvD1 was able to  
68 decrease parasite load in the infected hearts. Thus, this research indicates that At-RvD1 treatment is  
69 a potential therapeutic strategy that offers an improvement on current drug therapies.

70

71 Keywords: Chagas disease, cardiomyopathy, AT-RvD1, inflammation, immunomodulation,  
72 immunoregulation

73

74

75

76

77

78

79

## 80 **Introduction**

81 Chagas disease (CD) is caused by the protozoan *Trypanosoma cruzi*, which afflicts 7 million people  
82 in 21 endemic Latin American countries and is increasing in non-endemic countries due to  
83 migration (WHO, 2018). According to the World Health Organization [1], the most alarming  
84 statistics are that 30000 new cases, of which 8000 are newborns, are reported annually and there are  
85 more than 10000 deaths per year. Only 1% of patients receive adequate and opportune treatment.  
86 Clinically, CD initially presents an acute phase, generally asymptomatic, but in the absence of  
87 treatment a chronic phase develops. In 30% of chronic cases, patients develop cardiac or digestive  
88 complications 10-30 years after acquiring the infection [2, 3]. Chronic Chagas cardiomyopathy  
89 (CCC) is considered the most frequent and severe clinical manifestation of CD. It is characterized  
90 by focal inflammatory infiltrates, cardiac hypertrophy, and fibrosis, leading to abnormalities in the  
91 electrical conduction system and heart failure [4]. Sudden death is the leading cause of mortality in  
92 patients with CCC [5]. Chronic inflammation is considered one of the most important mechanisms  
93 involved in the pathogenesis of CD and has been proposed as a consequence of tissue damage due  
94 to the persistence of live parasites [6]. This chronic inflammation is a determining factor in the  
95 deterioration of heart architecture and loss of functionality [7]. The current treatment for CD utilizes  
96 nitroheterocyclic drugs, such as benznidazole (Bz), which are far from efficacious. For that reason,  
97 new approaches for treating this disease or improving the action of current antiparasitic drugs are  
98 needed.

99 Acute inflammation is a natural protective mechanism of the host in response to injury or invading  
100 pathogens. The resolution of inflammation is an active process orchestrated by molecules known as  
101 specialized pro-resolving mediators (SPM) that culminate inflammatory processes [8]. Endogenous  
102 SPMs actively participate in the dampening of host responses and the resolution of inflammation.  
103 Mainly produced by macrophages and neutrophils from distinct omega-3 polyunsaturated fatty acid  
104 pathways, the four families of SPMs, lipoxins, maresins, protectins, and resolvins, have been shown

105 to act as initiators of the resolution of acute inflammation; therefore, they limit polymorphonuclear  
106 neutrophil infiltration, counteract the production of cytokines and chemokines, and enhance  
107 macrophage-mediated actions [9]. Resolvin D1 (RvD1) is a novel SPM whose effects on  
108 inflammatory diseases dampen pathological inflammatory responses and restore tissue homeostasis  
109 [10]. Some drugs such as acetylsalicylic acid (ASA) modify the activity of cyclooxygenase 2  
110 (COX-2), allowing SPM epimer generation, specifically 15-epi-LXA<sub>4</sub> and AT-RvD1-4 [11, 12].  
111 These “aspirin-triggered” SPMs have the advantage of being more stable to enzymatic degradation  
112 than endogenous molecules and can serve as anti-inflammatory drugs [11, 13].

113 In CD, ASA has been extensively studied and beneficial effects have been reported closely related  
114 to its dose. In experimental models, a low dose of ASA (25 mg/kg) improves survival, reduces heart  
115 inflammatory infiltrates, and improves cardiac tissue architecture. These effects were associated  
116 with a significant increase in the production of 15-epi-LXA<sub>4</sub> [14]. Moreover, this aspirin-triggered  
117 lipoxin reduces the internalization of *T. cruzi* in macrophages [15], an effect mediated by N-formyl  
118 peptide receptor 2 (FPR2) [16, 17]. These effects have highlighted the role of FPR2 in the beneficial  
119 effects of ASA. In recent years, the effects of AT-RvD1 on CD have been reported in several  
120 publications. First, on peripheral mononuclear cells (PBMCs) from patients with stage B1 Chagas  
121 heart disease (having few cardiac abnormalities), AT-RvD1 had an immunomodulatory effect by  
122 decreasing the production of pro-inflammatory cytokines such as interferon-gamma (IFN $\gamma$ ) and the  
123 proliferation of PBMCs after stimulation with *T. cruzi* antigen, counteracting the inflammatory  
124 environment [18]. Second, the effect of RvD1 was recently studied in a murine model chronically  
125 infected with *T. cruzi*, where RvD1 therapy increased the survival rate and regulated the  
126 inflammatory response by reducing serum IFN $\gamma$  levels and increasing serum IL-10 levels.  
127 Furthermore, RvD1 reduced inflammatory infiltrates, favoring the resolution of *T. cruzi* infection  
128 and preventing cardiac fibrosis [19].

129 After infection in mammals, *T. cruzi* induces robust innate and adaptive immune responses, which  
130 play a significant role during the acute and chronic phases of the disease. Nonetheless, these  
131 responses are insufficient to achieve complete clearance of the parasite, and parasite persistence  
132 promotes low and sustained inflammation over time [6]. Therefore, because of the benefits of AT-  
133 RvD1 in reducing pathological inflammatory processes and promoting restoration of tissue  
134 homeostasis, it is possible that AT-RvD1 administration in CD aids in the prevention of  
135 inflammatory damage secondary to parasite persistence and in parasite clearance. In the present  
136 study, we evaluated the effects of AT-RvD1 and whether Bz and AT-RvD1 combined therapy could  
137 improve parasite control and reduce inflammation, heart damage, and irregular cardiac electrical  
138 activity, limiting the progress of CCC in a murine model of chronic CD. Thus, we have identified  
139 AT-RvD1 as a new potential therapeutic approach to modulate the pathogenesis of CD.

140

141

142

143

144

145

146

147

148

149

150

151 **Methods**

152 Animals

153 Animal care and handling procedures were in accordance with the guidelines of the local animal  
154 ethics committee. Eight to ten-week-old C57BL/6 wild-type (WT) mice were obtained from the  
155 Animal Care Facilities of Universidade Federal de Minas Gerais (UFMG, Brazil). The FPR2  
156 knockout mice were bred on a C57BL/6 genetic background under pathogen-free conditions at the  
157 Instituto de Ciências Biológicas – UFMG. The animals were randomly distributed and were housed  
158 at 2 to 3 animals per box in a controlled environment at constant temperature, under a 12-h  
159 day/night cycle, and with food and water available *ad libitum*. This research study was carried out  
160 in strict accordance with the Brazilian Guidelines on animal work and the Guide for the Care and  
161 Use of Laboratory Animals of the National Institutes of Health (NIH). The Institutional Bioethics  
162 Committee of the Faculty of Medicine, University of Chile, approved the supervising protocols  
163 (Protocol CBA# 1078 FMUCH, associated with FONDECYT-Chile grant number 1170126).

164 Parasites and infection protocols

165 Dm28c trypomastigotes from Vero cell cultures ( $1 \times 10^5$ ) were used to intraperitoneally inoculate  
166 the C57Bl/6 mice. At the peak of parasitemia, blood was collected and pooled from various donors,  
167 and the parasites were counted by direct visualization of a drop of blood under a light microscope.  
168 Finally, the trypomastigotes were suspended in sterile saline, and  $1 \times 10^3$  trypomastigotes in 100  $\mu$ L  
169 were injected into each experimental animal. After randomization, the animals were divided into  
170 five groups (healthy groups) or eight groups (infections and different treatments). *T. cruzi* infection  
171 was confirmed from the third day after infection by direct microscopic visualization of circulating  
172 trypomastigotes in peripheral blood samples obtained from the tail tip. Subsequently, the  
173 parasitemia was monitored every two days via peripheral blood samples until undetectable [14].

174 Treatment protocols

175 Infected C57BL/6 WT and FPR2<sup>-/-</sup> mice were treated with 5 µg/kg/day aspirin-triggered Resolvin  
176 D1 (AT-RvD1) (Cayman Chemicals®, Ann Harbor, MI, USA), 30 mg/kg/day Bz (Abarax - Elea  
177 Laboratory, Buenos Aires, Argentina), or a combination of 5 µg/kg/day AT-RvD1 + 5 mg/kg/day  
178 Bz. The Bz was suspended in 0.5% carboxymethylcellulose and administered orally once a day.  
179 AT-Rv1 was dissolved in 0.01% ethanol and administered intraperitoneally once a day. The  
180 treatments were administered from day 40 to 60 post-infection (p.i.). On day 60 p.i., the animals  
181 were anesthetized with 100 mg/kg ketamine and 10 mg/kg xylazine, and their blood and hearts  
182 removed. The hearts were halved, with one half fixed in 4% formaldehyde in 0.1 M phosphate-  
183 buffered saline (PBS; pH 7.3) for histological analysis and the other half extracted in TRIzol™  
184 (Invitrogen, Waltham, MA, USA) for mRNA expression analysis by RT-qPCR.

#### 185 Enzyme-linked immunosorbent assay (ELISA)

186 Peripheral blood was collected from the submandibular vein of the C57BL/6 mice on days 20 and  
187 40 p.i. On day 60, whole blood was collected after euthanasia. The blood was centrifuged, and the  
188 resulting serum was stored at -80 °C. Cytokine quantification was performed on the serum samples  
189 by ELISA using specific mouse monoclonal antibodies from the ELISA Max Deluxe Set for mouse  
190 tumor necrosis factor alpha (TNFα), IFNγ, interleukin (IL)-1β, and IL-10 (BioLegend, San Diego,  
191 CA, USA), following the manufacturer's instructions. The absorbance of the ELISA plate wells was  
192 read at 450 nm in a microplate reader Biotek® (Winooski, VT, USA). All samples were analyzed in  
193 duplicate.

#### 194 Quantitative reverse transcription PCR (RT-qPCR) assay

195 For measurements of cytokine gene expression in cardiac tissue, total RNA was isolated using  
196 TRIzol™ reagent, followed by DNase treatment and purification using the PureLink RNA Mini Kit  
197 (Thermo Fisher Waltham, MA, USA) according to the manufacturer's instructions. cDNA was  
198 synthesized from 600 ng of total RNA by reverse transcription using M-MLV reverse transcriptase



199 and random primers (Invitrogen). For the qPCR analyses, each reaction mix contained 150 nM of  
200 each primer (forward and reverse), 1 ng of sample cDNA, 7  $\mu$ L of SensiMix™ SYBR® Green  
201 Master Mix (Bioline®, Memphis, TE, USA), and H<sub>2</sub>O in a total volume of 15  $\mu$ L. The primers used  
202 for the analysis of cytokines and hypertrophy markers were the following: TNF $\alpha$ , Fw: 5'-  
203 TAGCCACGTCGTAGCAAAC-3' and Rv: 5'-ACAAGGTACAACCCATCGGC-3'; IFN $\gamma$ , Fw:  
204 5'-AACTGGCAAAAGGATGGTGAC-3' and Rv: 5'-TTGCTGATGGCCTGATTGTC-3'; IL-1 $\beta$ ,  
205 Fw: 5'-TGCCACCTTTTGACAGTGATG-3' and Rv: 5'-GTGCTGCTGCGAGATTTGAA-3'; IL-  
206 10, Fw: 5'-ACCTGGTAGAAGTGATGCC-3' and Rv: 5'-ACAGGGGAGAAATCGATGACAG-  
207 3'; atrial natriuretic peptide (ANP), Fw: 5'-GGGCTTCTCCTCGTCTTGG-3' and Rv: 5'-  
208 GTGGTCTAGCAGGTTCTTGAAT-3'; brain natriuretic peptide (BNP), Fw: 5'-  
209 CAGAGCAATTCAAGATGCAGAAGC-3' and Rv: 5'-CTGCCTTGAGACCGAAGGAC-3'. The  
210 amplification was performed in an ABI Prism 7300 sequence detector (Applied Biosystems®,  
211 Waltham, MA, USA). The cycling program was as follows: a denaturation step at 95 °C for 3 min  
212 and 40 amplification cycles of 95 °C (15 s), 60 °C (15 s), and 72 °C (30 s). The final step was a  
213 dissociation stage that ramped from 60 to 95 °C over 100 s. For relative quantification, the results  
214 were expressed as RQ values determined using the comparative control (delta-delta-Ct (DDCt))  
215 method [20].

216 The presence of viable parasites in cardiac tissue was evaluated by amplification of 18S *T. cruzi*  
217 ribosomal RNA (rRNA). For this purpose, total RNA was isolated using TRIzol™ and purified  
218 using the PureLink RNA Mini Kit; cDNA was synthesized as detailed above. RT-qPCR was  
219 performed as described above with the following primers: 18S, Fw: 5'-  
220 TGGAGATTATGGGGCAGT-3' and Rv: 5'-GTTCGTCTTGGTGCGGTCTA-3'. The parasitic  
221 load of *T. cruzi* in the cardiac tissues was calculated from a standard curve constructed using 1  $\times$   
222 10<sup>8</sup> trypomastigotes of *T. cruzi*, serially diluted to provide a log curve in the range of 1 to 10<sup>8</sup>  
223 equivalent parasites/10 ng of tissue RNA.

224 Histology

225 The hearts from the euthanized mice were fixed in 4% formaldehyde (pH 7.3). Then, the fixed heart  
226 tissues were dehydrated with 50 to 100% ethanol, clarified with xylol, embedded in paraffin, and  
227 sectioned in 5  $\mu\text{m}$  slices. The sections were stained with hematoxylin and eosin to observe cellular  
228 infiltration and cardiomyocyte cross-sectional area or with picosirius red to observe collagen  
229 organization. Images were obtained using a spinning-disk microscope (Olympus BX42). Five fields  
230 per heart (40X) were analyzed using Image J software.

231 For the analysis of cellular infiltrates, the nuclei present in five fields of each heart were quantified.  
232 The number of nuclei per tissue area was counted in order to eliminate empty tissue areas. In the  
233 analysis of cardiomyocyte cross-sectional area, only muscle fibers with well-defined borders and a  
234 nucleus inside were included. For the analysis of fibrosis in the picosirius red-stained slides, the  
235 red-colored pixels in the cardiac tissue were quantified in five fields per animal.

236 Electrocardiogram (ECG) recording and analysis

237 ECG recording was performed using a six-channel non-invasive electrocardiograph (ECG-PC  
238 version 2.07, Electronic Technology of Brazil (TEB), Belo Horizonte/MG, Brazil). The mice were  
239 anesthetized initially with 2.5% isoflurane and then maintained with 1.5% isoflurane (VetCase-  
240 Incotec, Serra/ES, Brazil). The mice were placed in a dorsal recumbent position on a wooden table  
241 covered with plastic material; electrocardiographic gel was applied, and four alligator clip  
242 electrodes were attached to the skin of the forelimbs and hindlimbs. All procedures were performed  
243 in a quiet room to minimize stress.

244 All ECGs were performed and analyzed by the same technician according to standard methods for  
245 ECG trace analysis. The tracings were recorded from six leads of the frontal plane at a velocity of  
246 50 mm/s. In each tracing, three segments containing five beats (lead II) were selected for quality  
247 (clean baseline with no artifacts), and the mean values for heart rate (HR) and duration of the

248 intervals and waves were determined. The parameters evaluated were heart rate, P wave, QRS  
249 complex, PR interval, and QT interval. QT-corrected values were obtained from Bazett's formula.

## 250 Statistical analysis

251 For all experiments, statistical significance was established at p values of 0.05. The data represent  
252 the means  $\pm$  standard deviations (SD) from at least three independent observations or experiments.  
253 All statistical analyses were performed using GraphPad Prism 8.0 software. One-way and two-way  
254 analyses of variance (ANOVAs) (with Tukey's post-hoc tests) were performed as appropriate. A  
255 log-rank test was performed for survival analysis.

256

257

## 258 **Results**

### 259 Effect of the absence of FPR2 on *T. cruzi* parasitemia

260 The progression of parasitemia and mortality in C57BL/6 WT and FPR2<sup>-/-</sup> mice infected with *T.*  
261 *cruzi* strain Dm28c were determined to evaluate the establishment of a murine model for chronic  
262 CD (Fig 1). As expected, in the WT mice, detectable parasitemia persisted for approximately 40  
263 days, with the peak of infection occurring at 27 days p.i. (Fig 1A). In the FPR2<sup>-/-</sup> mice, the  
264 parasitemia level was significantly lower in the second peak of infection, but the overall kinetics  
265 during the acute phase was similar to that of the WT mice.

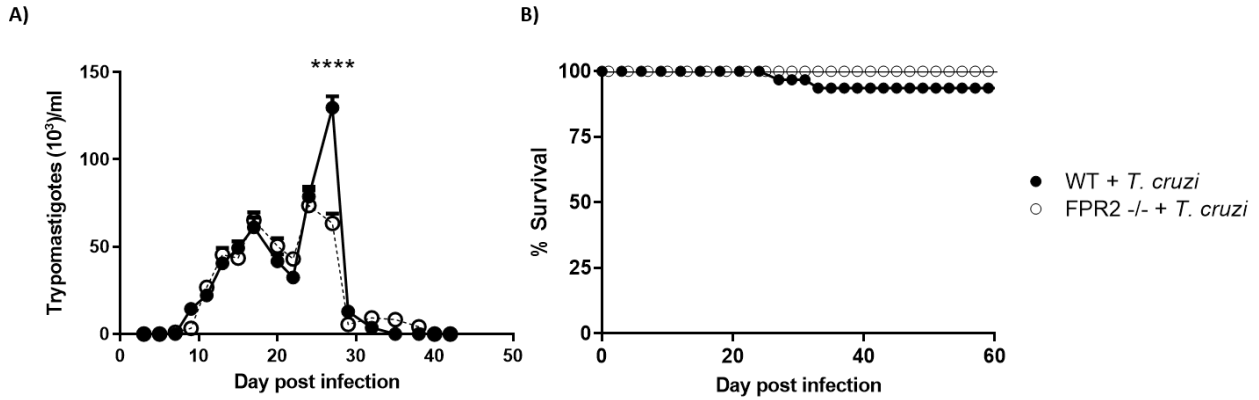

266

267 **Fig 1. Parasitemia and survival in C57BL/6 wild-type (WT) or FPR2 knock-out (FPR2<sup>-/-</sup>)**  
268 **mice infected with *Trypanosoma cruzi* (Dm28c).** A) Blood parasite levels, B) Kaplan-Meier  
269 survival curves. Data are expressed as the mean  $\pm$  SD ( $n = 8$ ). Two-way ANOVA was performed to  
270 identify significant differences, \*\*\*\* $p \leq 0.0001$ .

271

272 Furthermore, survival rates were high for all mice until the end of the experiment, regardless of  
273 their genetic background, confirming that the mortality of this murine model of *T. cruzi* chronic  
274 infection was low.

275 Regarding inflammatory responses, changes in serum levels of pro-inflammatory (TNF $\alpha$ , IFN $\gamma$ , IL-  
276 1 $\beta$ ) and anti-inflammatory cytokines (IL-10) were determined at days 20, 40, and 60 p.i. in WT and  
277 FPR2<sup>-/-</sup> mice infected with *T. cruzi* (S1 A, C, E, and G Fig). Both the healthy WT and FPR2<sup>-/-</sup> mice  
278 showed differences in serum cytokine levels at baseline and after *T. cruzi* infection. The healthy  
279 FPR2<sup>-/-</sup> mice had elevated levels of TNF $\alpha$  and IL-10 compared to those of the healthy WT mice (S1 A  
280 and G Fig). In addition, the magnitude of the inflammatory response was higher in the WT mice  
281 than in the FPR2<sup>-/-</sup> mice (S1B, D, and H Fig). At day 40 p.i., the infected WT mice still maintained  
282 slightly increased TNF $\alpha$ , IFN $\gamma$ , and IL-10 levels compared to their healthy controls, while the  
283 FPR2<sup>-/-</sup> mice only had slightly increased IFN $\gamma$  levels. These findings indicate that the FPR2<sup>-/-</sup> mice  
284 developed a different immune response against *T. cruzi* infection than the WT mice (S1 Fig).

285 Effect of AT-RvD1 treatment on the inflammatory state in CD

286 The effect of AT-RvD1 treatment on inflammation in chronic CD was evaluated by measuring  
287 serum cytokine levels at the end of treatment (60 dpi). Consistent with a chronic inflammatory state,  
288 the serum levels of pro-inflammatory cytokines such as TNF $\alpha$  (Fig 2A), IFN $\gamma$  (Fig 2B), and IL-1 $\beta$   
289 (Fig 2C) increased as a result of the infection in the WT and FPR2 $^{-/-}$  mice, although the IL-1 $\beta$   
290 increase in the FPR2 $^{-/-}$  mice was not significant. Unexpectedly, AT-RvD1 did not reduce serum  
291 TNF $\alpha$  levels in the WT mice (Fig 2A); however, AT-RvD1 treatment significantly reduced the  
292 serum levels of IFN $\gamma$  (Fig 2B) and IL-1 $\beta$  (Fig 2C), reaching healthy control levels. This effect was  
293 mediated by FPR2 because in the FPR2 $^{-/-}$  mice, AT-RvD1 treatment did not alter IFN $\gamma$  levels. In  
294 contrast, Bz, alone or combined with AT-RvD1, did not affect the increased serum levels of pro-  
295 inflammatory cytokines, except for IL-1 $\beta$  in the WT mice (Fig 2C). Either treatment produced  
296 negligible effects on IL-10 (Fig 2D).

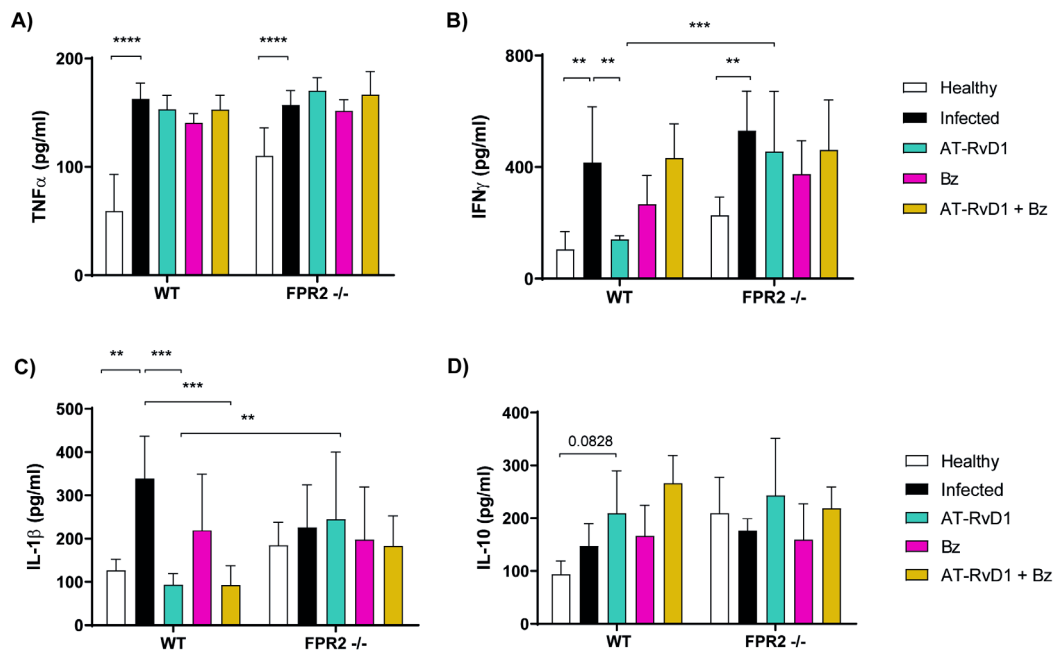

297

298 **Fig 2. Serum cytokine levels in mice infected with *Trypanosoma cruzi* and treated with AT-**  
299 **RvD1 and/or Bz at 60 days post-infection. The concentrations of TNF $\alpha$  (A), IFN $\gamma$  (B), IL-1 $\beta$  (C),**

300 and IL-10 (D) in serum were quantified by ELISA. Data are expressed as the mean  $\pm$  SD ( $n = 5$ ).  
301 Two-way ANOVAs and Tukey's post-hoc tests were performed to identify significant differences.  
302 \*\* $p \leq 0.01$ , \*\*\* $p \leq 0.001$ , \*\*\*\* $p \leq 0.0001$ . Bz, benznidazole; AT-RvD1, aspirin-triggered resolvin  
303 D1.

304 Because serum cytokine levels reflect systemic inflammatory states, it was also necessary to  
305 measure them in the heart to determine local inflammatory states. Thus, the effect on the immune  
306 response in cardiac tissue was determined by measuring relative cytokine mRNA levels after 20  
307 days of treatment with AT-RvD1 (60 dpi). In this case, mRNA levels of the pro-inflammatory  
308 TNF $\alpha$  (Fig 3A), IFN $\gamma$  and IL-1 $\beta$  (Fig 3C) cytokines were increased in both the WT and FPR2<sup>-/-</sup>  
309 infected mice. Although the mRNA levels of IFN $\gamma$  were exceedingly increased with the infection, it  
310 was not modified by At-RvD1 or Bz in WT and FPR2<sup>-/-</sup> mice (Fig 3B). Interestingly, in the WT and  
311 FPR2<sup>-/-</sup> mice, AT-RvD1 treatment significantly increased IL-10 expression levels (Fig 3D). AT-  
312 RvD1 prevented the increase in TNF $\alpha$  caused by infection. Neither Bz nor combinatorial therapy  
313 modified the mRNA levels of the measured cytokines.

314

315

316

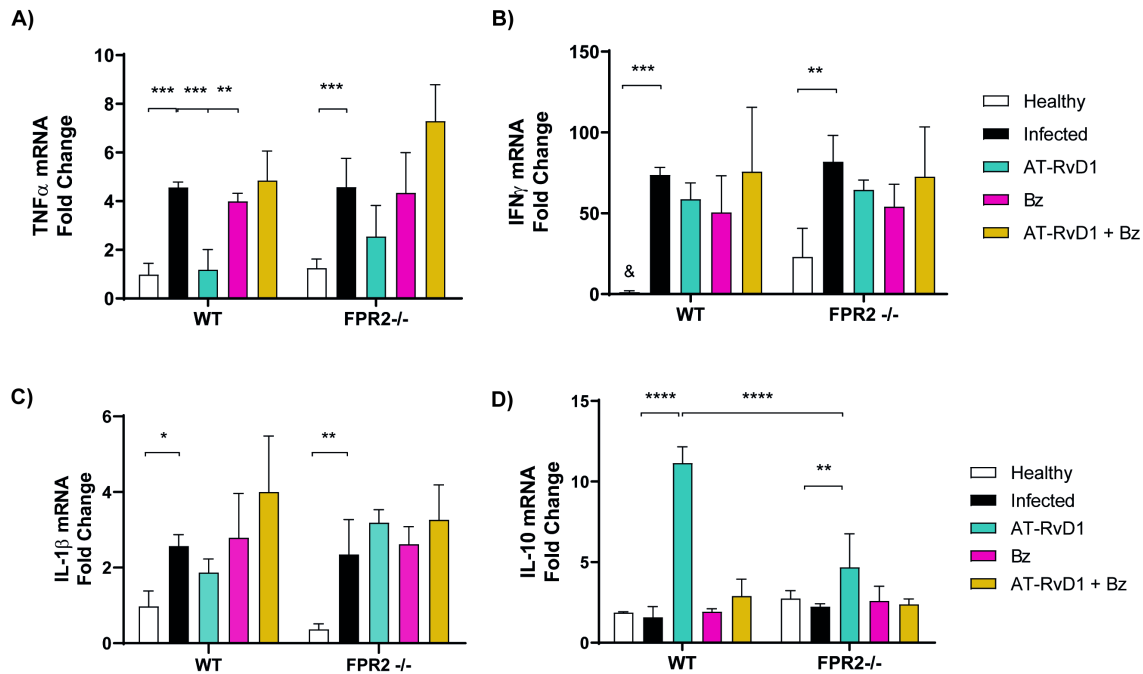

317

318 **Fig 3. Cytokine mRNA levels in cardiac tissue of mice infected with *Trypanosoma cruzi* and**  
 319 **treated with AT-RvD1 or Bz at 60 days post-infection.** The cardiac mRNA levels of TNF $\alpha$  (A),  
 320 IFN $\gamma$  (B), IL-1 $\beta$  (C), and IL-10 (D) are shown from uninfected C57BL/6 mice infected with *T. cruzi*  
 321 and treated with AT-RvD1 and Bz, as assessed by RT-qPCR. Data are expressed as the mean  $\pm$  SD  
 322 ( $n = 5$ ). Two-way ANOVAs and Tukey's post-hoc tests were performed to identify significant  
 323 differences. \* $p \leq 0.05$ , \*\* $p \leq 0.01$ , \*\*\* $p \leq 0.001$ , \*\*\*\* $p \leq 0.0001$ . & indicates indeterminate values.  
 324 Bz, benznidazole; AT-RvD1, aspirin-triggered resolvin D1.

325 In CCC, chronic inflammation is a determining factor in the deterioration of heart architecture. The  
 326 cellular infiltrates in heart tissue sections were measured to evaluate the effect of AT-RvD1  
 327 treatment on cardiac inflammation. Histological analysis of cardiac tissue stained with hematoxylin-  
 328 eosin was performed, and cellularity was quantified (Fig 4A). WT and FPR2<sup>-/-</sup> mice infected with *T.*  
 329 *cruzi* (60 dpi) showed focal inflammatory infiltrates and increased cellularity in cardiac tissue. AT-  
 330 RvD1 significantly reduced focal inflammatory infiltrates in the cardiac tissue (Fig 4B); the absence  
 331 of FPR2 impaired the reduction in cellular infiltrates, suggesting that this receptor mediates the AT-

332 RvD1 effect. Moreover, the effect of AT-RvD1 in reducing the inflammatory infiltrates had a  
333 higher significance level than that obtained with Bz alone. Consistently, the combination of AT-  
334 Rv1 with Bz significantly reduced the inflammatory infiltrates in the WT mice, whereas, in the  
335 absence of FPR2, the reduction in inflammatory infiltrates achieved by combinatorial therapy was  
336 probably dependent on the effect of Bz.

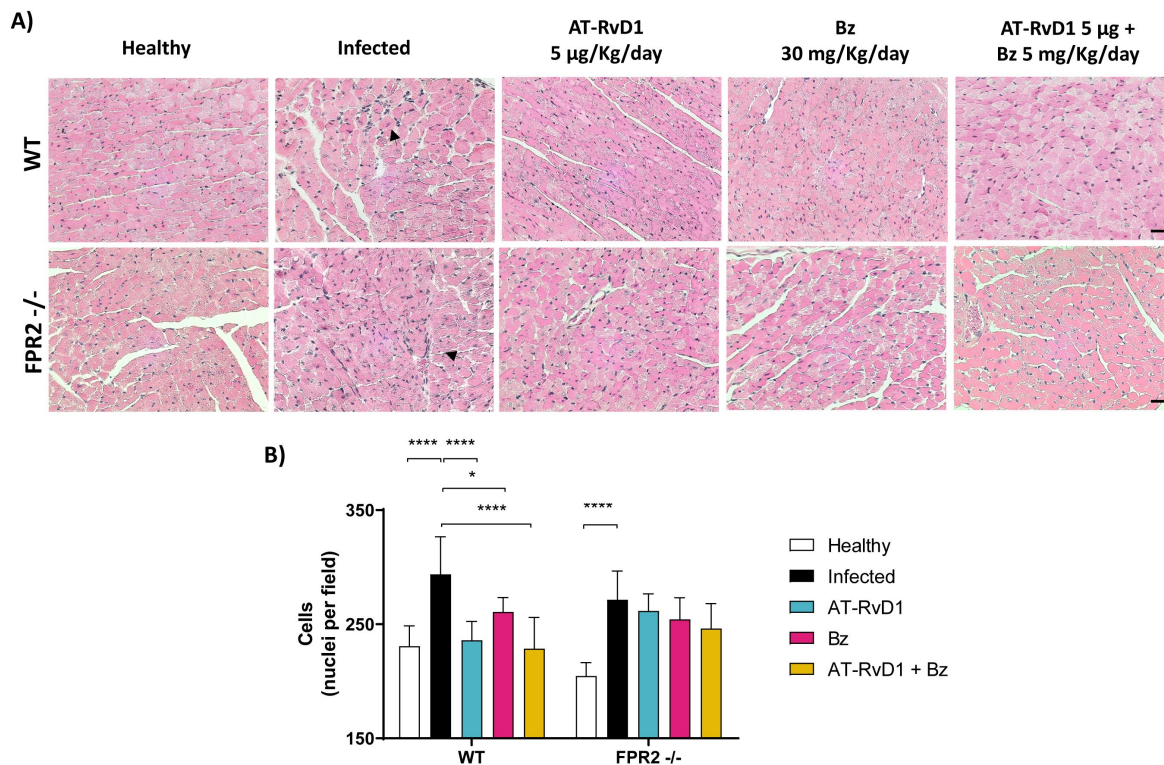

337

338 **Fig 4. AT-RvD1 reduces cellular infiltrates in the heart tissue of C57BL/6 mice chronically**  
339 **infected with *Trypanosoma cruzi*.** A) Representative images of heart tissue stained with  
340 hematoxylin and eosin from C57BL/6 mice infected with *T. cruzi* and treated with AT-RvD1 or  
341 benznidazole (Bz) at the indicated doses. Black arrows show infiltrated cells. Scale bar = 20 µm. B)  
342 Quantitative analysis of cellularity in cardiac tissues from five fields per animal. Data are expressed  
343 as the mean ± SD ( $n = 8$ ). A two-way ANOVA and Tukey's post-hoc tests were performed to



344 identify significant differences. \* $p \leq 0.05$ , \*\*\*\* $p \leq 0.0001$ . AT-RvD1, aspirin-triggered resolvin  
345 D1.

346

347 Through FPR2, AT-RvD1 prevents cardiac remodeling in chronic CD

348 Because cardiac hypertrophy and dysfunction are significant complications of CCC, the effect of  
349 AT-RvD1 on cardiac hypertrophy was assessed by measuring the cross-sectional area of  
350 cardiomyocytes from heart tissue sections stained with hematoxylin-eosin (Fig 5A). *T. cruzi*  
351 infection increased the cross-sectional area of cardiomyocytes in the WT and FPR2<sup>-/-</sup> mice after 60  
352 dpi, demonstrating structural changes in the earliest phases of chronic disease. It is striking that in  
353 healthy FPR2<sup>-/-</sup> mice, the cross-sectional areas were also increased compared with those in the WT  
354 mice, which was consistent with the overall increase in circulating cytokine levels (Fig 2). Although  
355 AT-RvD1 significantly reduced cardiomyocyte cross-sectional area, the effect was blunted by the  
356 absence of FPR2 because in the FPR2<sup>-/-</sup> mice, there was no reduction in cardiac hypertrophy (Fig  
357 5B). It is important to note that Bz alone did not affect cardiac hypertrophy; however, when  
358 combined with AT-RvD1, it significantly reduced the cross-sectional area of cardiomyocytes in the  
359 WT mice, but not in the absence of FPR2. These results suggest that AT-RvD1 therapy can reduce  
360 cardiac hypertrophy. These observations were supported by measuring the mRNA levels of ANP  
361 and BNP, molecular markers of cardiac hypertrophy (Fig 5C and D, respectively). Both ANP and  
362 BNP were significantly increased in the infected WT and FPR2<sup>-/-</sup> mice (60 dpi), although the  
363 changes in the FPR2<sup>-/-</sup> mice were negligible. Consistent with the histological analyses, treatment  
364 with AT-RvD1 significantly reduced both molecular markers of cardiac hypertrophy. However, the  
365 absence of FPR2 did not change the effect of AT-RvD1, suggesting that an alternative way  
366 mediated this effect. Bz alone or combined with AT-RvD1 did not modify these molecular markers  
367 of hypertrophy.

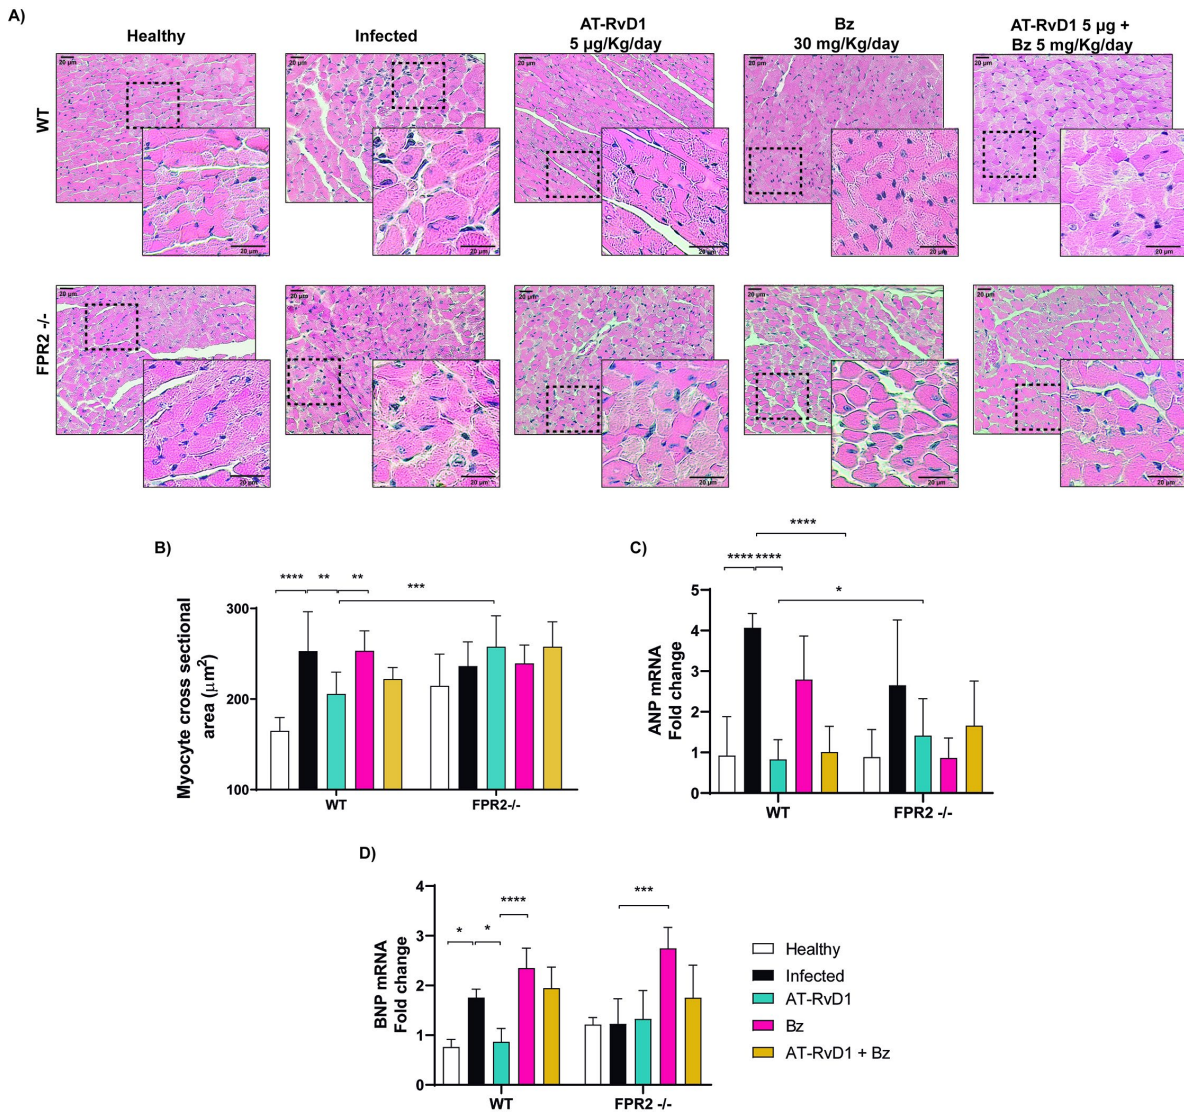

368

369 **Fig 5. AT-RvD1 reduces cardiac hypertrophy in C57BL/6 chronically infected with**  
 370 ***Trypanosoma cruzi*.** A) Images are enlargements of the representative images shown in Fig 4. B)  
 371 Analysis of the cross-sectional area of cardiomyocytes; 200 cardiomyocytes were randomly chosen  
 372 per animal. Scale bar = 20 µm. C, D) mRNA levels of atrial natriuretic peptide (ANP) and brain  
 373 natriuretic peptide (BNP), as markers of hypertrophy, are shown from cardiac tissue of C57BL/6  
 374 mice infected with *T. cruzi* and treated with AT-RvD1 and/or Bz, as measured by RT-qPCR. Data  
 375 are expressed as the mean ± SD ( $n = 5$ ). Two-way ANOVAs and Tukey's post-hoc tests were

376 performed to identify significant differences. \* $p \leq 0.05$ , \*\* $p \leq 0.01$ , \*\*\* $p \leq 0.001$ , \*\*\*\* $p \leq 0.0001$ .

377 Bz, benznidazole; AT-RvD1, aspirin-triggered resolvin D1.

378

379 Although cardiac hypertrophy in chronic CD is a hallmark of cardiac remodeling, cardiac fibrosis

380 reflects more profound structural damage. Thus, the effect of AT-RvD1 on cardiac fibrosis in CCC

381 was analyzed in cardiac tissue stained with picrosirius red to visualize collagen fibers (Fig 6A).

382 Consequently, cardiac fibrosis was increased with CD progression in both WT and *FPR2*<sup>-/-</sup> infected

383 mice (60 dpi), and AT-RvD1 significantly reduced this cardiac fibrosis more efficiently than Bz in

384 both genotypes.

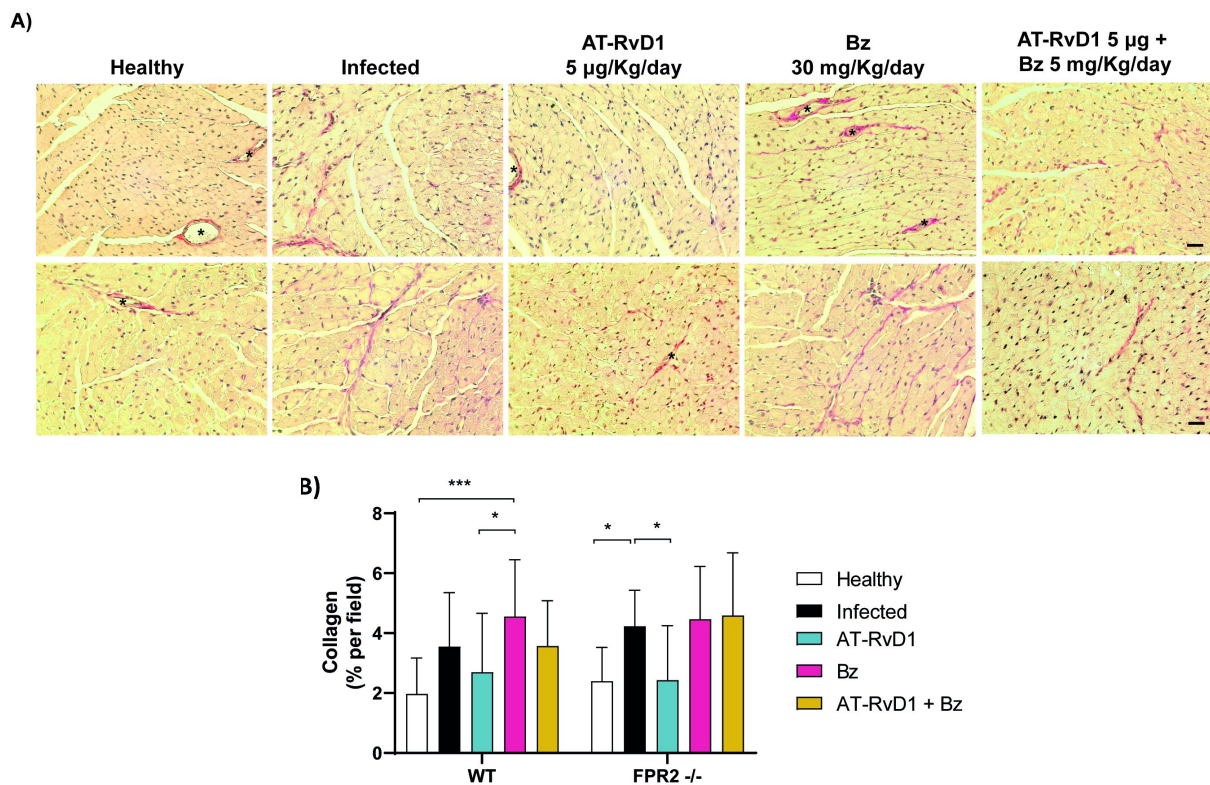

385

386 **Fig 6. AT-RvD1 reduces cardiac fibrosis in C57BL/6 mice chronically infected with**

387 *Trypanosoma cruzi*. A) Representative images of picrosirius red-stained heart tissue from C57BL/6

388 mice infected with *T. cruzi* (Dm28c) and treated with AT-RvD1 or benznidazole (Bz) at the

389 indicated doses. Asterisks show blood vessels. Scale bar = 20  $\mu$ m. B) Quantitative analysis of red  
390 pixels in the stained cardiac tissue, corresponding to regions of fibrosis, from five fields per animal.  
391 Data are expressed as the mean  $\pm$  SD ( $n = 8$ ). A two-way ANOVA and Tukey's post-hoc tests were  
392 performed to identify significant differences. \* $p \leq 0.05$ , \*\*\* $p \leq 0.001$ . AT-RvD1, aspirin-triggered  
393 resolvin D1.

394 Signs of cardiac remodeling include atrioventricular and intraventricular conduction disorders such  
395 as right bundle branch block, sinus bradycardia, and QT interval changes, alterations that may occur  
396 early p.i. [21, 22]. Thus, the electrocardiographic activities of the C57BL/6 WT and FPR2<sup>-/-</sup> mice  
397 were evaluated at the end of the treatments. However, at 60 dpi, no significant changes were found  
398 in the ECG parameters of the mice (S2 Fig).

#### 399 AT-RvD1 reduces parasite load in chronic CD

400 Cardiac parasite load was determined to verify establishment of the chronic phase and impact of the  
401 treatments on parasite clearance. For this determination, RT-qPCR of *T. cruzi* 18S rRNA was  
402 performed to determine parasite numbers in the cardiac tissue at the end of the treatments. As  
403 expected, Bz reduced cardiac *T. cruzi* load to undetectable levels in both the WT and FPR2<sup>-/-</sup> mice  
404 (Fig 7). However, a surprising finding was that AT-RvD1 decreased the cardiac *T. cruzi* load in the  
405 WT and FPR2<sup>-/-</sup> mice, although the decrease in parasitic load was less marked in the null mice. This  
406 finding was unexpected because AT-RvD1 does not have trypanocidal properties.

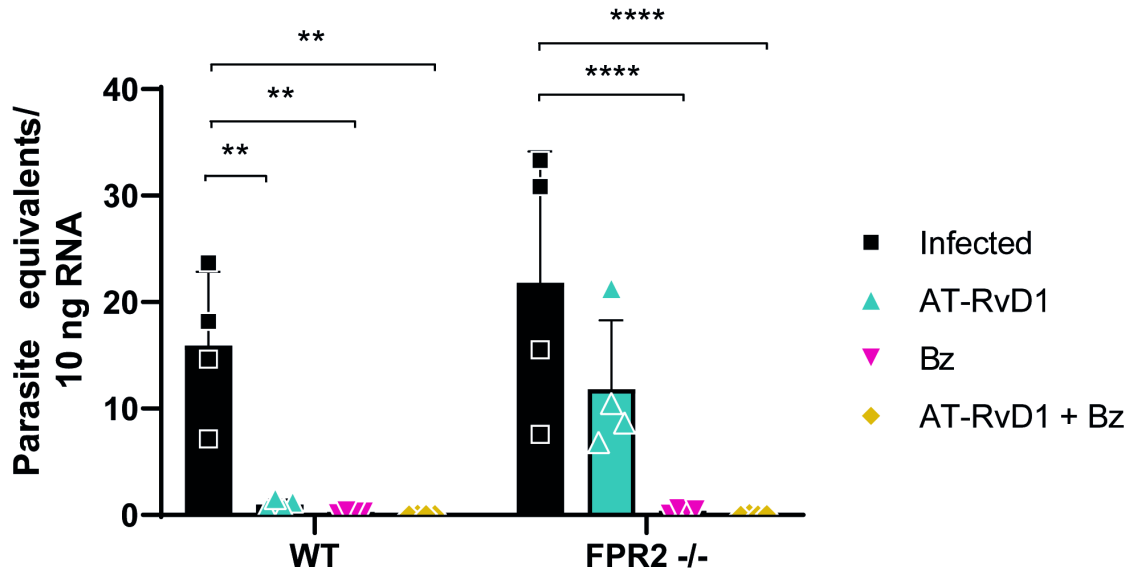

407

408 **Fig 7. Parasite load in cardiac tissue of mice chronically infected with *Trypanosoma cruzi* and**  
409 **treated with AT-RvD1 and/or Bz at 60 dpi.** 18S rRNA from *T. cruzi* was detected by RT-qPCR.  
410 Data are expressed as the mean  $\pm$  SD ( $n = 4$ ). Two-way ANOVA and Tukey's post-hoc tests were  
411 performed to identify significant differences. \*\* $p \leq 0.01$ , \*\*\*\* $p \leq 0.0001$ . Bz, benznidazole; AT-  
412 RvD1, aspirin-triggered resolvin D1.

413

## 414 Discussion

### 415 Involvement of inflammation resolution in parasitemia control

416 In the experimental model used, the course of parasitemia in the WT mice was representative of the  
417 behavior expected by the Dm28c strain of *T. cruzi* [14, 23]. In contrast, the FPR2<sup>-/-</sup> mice showed a  
418 decrease in parasitemia. The latter results are consistent with other experimental models where the  
419 deletion of 5-lipoxygenase (5-LO), which participates in the biosynthesis of lipoxins, also  
420 developed reduced parasitemia [24, 25]. However, in other studies, 5-LO deficiency led to  
421 increased parasitemia without affecting survival or infection control [26, 27]. These results suggest

422 that the breakdown of one or more pro-resolving elements of inflammation allows better control of  
423 the parasite during the acute phase of the disease. This is probably caused by less containment of  
424 the inflammatory response and an increased macrophage capability to eliminate parasites.  
425 Specifically, parasitemia in the FPR2<sup>-/-</sup> mice was reduced after three weeks p.i., the time when an  
426 adaptive antigen-specific response is established and cytotoxic and helper T lymphocytes and B  
427 cells participate [28]. These responses could be more efficient in the FPR2<sup>-/-</sup> mice.

428 The WT and FPR2<sup>-/-</sup> mouse survival was similar and elevated throughout the experimental timeline,  
429 probably because the C57BL/6 mouse lineage is resistant to infection with *T. cruzi* [29].  
430 Interestingly, healthy FPR2<sup>-/-</sup> mice had elevated basal levels of IL-10 (S1 Fig), which could be  
431 related to a lower risk of mortality during the acute phase of infection. In contrast, infected IL-10  
432 knockout mice have a poor survival rate [30]. Thus, the anti-inflammatory balance mediated by IL-  
433 10 likely plays a fundamental role in the survival and control of deleterious inflammatory  
434 responses, probably mediated by Treg cell functions [25, 31].

435 The transition from acute to chronic phase is accompanied by decreased tissue parasitism and blood  
436 parasitemia and control of the inflammatory response [32], which was observed in our experimental  
437 model at 40 p.i.

#### 438 AT-RvD1 decreases the inflammatory process in chronic CD

439 Our results showed that infection with *T. cruzi* triggers a robust inflammatory response in the acute  
440 phase, with the production of inflammatory cytokines, such as IFN $\gamma$  and TNF $\alpha$ , which have been  
441 shown to activate macrophages to eliminate the parasite [32]. At day 60 p.i., the WT mice showed  
442 slightly increased but sustained levels of the pro-inflammatory cytokines TNF $\alpha$ , IFN $\gamma$ , and IL-1 $\beta$ ,  
443 reflecting an inflammatory state in the early stages of chronicity. Treatment with AT-RvD1 during  
444 the early chronic phase significantly reduced the serum levels of IFN $\gamma$  and IL-1 $\beta$ , producing an  
445 immunoregulatory effect of the inflammatory state at the systemic level. These results are consistent

446 with previous studies, which have shown that PBMCs obtained from chagasic patients in stage B1  
447 (the initial stage of CCC) treated with AT-RvD1 had lower IFN $\gamma$  production than after antigenic re-  
448 exposure to *T. cruzi*, and their cell proliferation was reduced, highlighting the immunomodulatory  
449 effect of AT-RvD1 [18].

450 At the cardiac level, the scenario against *T. cruzi* is not very different. An imbalance is found, with  
451 high levels of pro-inflammatory cytokines (TNF $\alpha$ , IFN $\gamma$ , and IL-1 $\beta$ ) and practically unchanged  
452 levels of anti-inflammatory cytokines (IL-10). This could reflect the cell populations (including  
453 macrophages, cytotoxic T lymphocytes, and helper T lymphocytes) infiltrating the cardiac tissue to  
454 coordinate parasite control and represents an exacerbated production of cytokines related to tissue  
455 destruction [6]. However, the participation of other cardiac cells such as fibroblasts, endothelial  
456 cells, and cardiomyocytes has not been excluded [33]. Moreover, treatment with AT-RvD1  
457 generates an immunomodulatory effect by drastically reducing the production of TNF $\alpha$  at the  
458 cardiac level and suddenly increasing the production of IL-10. This suggests that AT-RvD1  
459 increases the proportion of IL-10-producing cells (macrophage subpopulations, Treg and Breg cells)  
460 in cardiac tissue to regulate the inflammatory environment.

461 Furthermore, the decrease in TNF $\alpha$  production may be secondary to the increase in IL-10 because  
462 the latter is a potent inhibitor of TNF $\alpha$  mRNA expression through activation of the STAT3  
463 transcription factor pathway in human monocytes and macrophages [34]. That would also explain  
464 why, at the systemic level, we did not observe a reducing effect of TNF $\alpha$ . High levels of IL-10 have  
465 been associated with evasion of the immune response by different pathogens, including *T. cruzi*  
466 [35], contributing to increased mortality or persistence of damage [36]. However, high IL-10 levels  
467 can also decrease inflammation and pathology; consequently, a pro/anti-inflammatory balance is  
468 necessary for the natural evolution of the disease [37]. Nevertheless, elevated levels of IL-10 seem  
469 to be related to maintaining adequate cardiac function in indeterminate patients with CD [38-40].  
470 Therefore, the AT-RvD1 effect on IL-10 production in the heart appears to be beneficial for

471 preventing CCC progression since changes in IL-10 levels have been associated with losing the  
472 ability to control the inflammatory immune response.

473 Although IFN $\gamma$  is produced in the heart tissue by Th1 cell infiltrates in CCC, there was no change in  
474 the mRNA of this cytokine after AT-RvD1 treatment. This finding does not correlate with the  
475 corresponding IFN $\gamma$  serum levels. However, AT-RvD1 reduced the inflammatory infiltrate in  
476 cardiac tissue and was more efficient than Bz alone, probably mediated by reduced cellular and  
477 vascular adhesion molecules (VCAM, ICAM) [41-43] in conjunction with modulation of the  
478 inflammatory environment, as discussed above.

479 Previous studies have shown that the anti-inflammatory and pro-resolving properties of AT-RvD1  
480 are primarily mediated by FPR2 [43]. In our model, FPR2 plays a fundamental role in regulating  
481 pro-inflammatory and anti-inflammatory cytokines (IFN $\gamma$  and IL-1 $\beta$ ) and reducing cellular  
482 infiltrates because its absence weakens the effect produced by AT-RvD1. Although the mechanism  
483 of action of RvD1 is not fully understood, it has been shown to exert its anti-inflammatory effects  
484 by inhibiting the NF- $\kappa$ B pathway [44, 45], suppressing cytosolic calcium, and decreasing activation  
485 of the calcium-sensitive kinase calcium-calmodulin-dependent protein kinase II (CaMKII) [46].

486 Previous studies have shown that Bz, in addition to its trypanocidal properties, reduces cardiac cell  
487 infiltrates and the production of inflammatory mediators via inhibition of the NF- $\kappa$ B pathway [5,  
488 47-49], apparently, an effect dependent on IL-10 [50]. However, in the chronic CD model presented  
489 herein, Bz did not regulate production of the pro-inflammatory (TNF $\alpha$ , IFN $\gamma$ , and IL-1 $\beta$ ) and anti-  
490 inflammatory (IL-10) cytokines studied. Thus, there was only a slight reduction in the inflammatory  
491 infiltrates with Bz treatment. Moreover, the combination of 5 mg/kg Bz and 5  $\mu$ g/kg AT-RvD1  
492 reduced cardiac inflammatory infiltrates but did not modulate the pro- and anti-inflammatory  
493 cytokines studied. Unfortunately, no synergistic or additive effect could be observed between the  
494 two drugs. Although both drugs act by inhibiting the NF- $\kappa$ B pathway, Bz could also increase



495 reactive oxygen species production at the tissue level [51, 52], contributing to the production and  
496 establishment of a pro-inflammatory environment. This possibly explains why, although Bz is  
497 effective as a trypanocidal therapy, it does not reduce the cardiovascular events observed in patients  
498 with CCC [53].

499 The most recurrent lesion in advanced CCC is fibrosis and wall thinning, consistent with dilated  
500 cardiomyopathy. Cardiomyocyte loss, due to parasite persistence and the consequent inflammatory  
501 process, is characteristic of myocarditis, which is much less intense in indeterminate patients. Here,  
502 cardiomyocyte hypertrophy was observed, evidenced by an increase in cell cross-sectional area and  
503 correlated with elevated levels of natriuretic peptides, indicating hemodynamic overload. Together  
504 with the interstitial fibrosis observed, these findings point to the presence of myocarditis  
505 characteristic of CCC [7].

506 To the best of our knowledge, until now, the effect of AT-RvD1 on hypertrophy produced by  
507 infection with *T. cruzi* had not been studied. Herein, AT-RvD1 was shown to reduce both the cross-  
508 sectional area of cardiomyocytes and the transcription of hypertrophy markers such as ANP and  
509 BNP, which have been associated with different stages and severity of CCC [54, 55]. Furthermore,  
510 during *T. cruzi* infection, the participation of endothelin-1, cardiotrophin-1, and cytokines such as  
511 TNF $\alpha$  and IL-1 $\beta$  has been previously highlighted as pro-hypertrophic [56]. Therefore, the effect of  
512 AT-RvD1 on hypertrophy could also be a consequence of its immunoregulatory effect [57].  
513 Although FPR2 mediates the anti-hypertrophic effect of AT-RvD1, it also activates G protein-  
514 coupled receptor 23 (GPR23) [58]. Thus, GPR32 participation may be an alternative pathway for  
515 the action of AT-RvD1, explaining the changes in ANP and BNP expression observed in the FPR2<sup>-/-</sup>  
516 mice.

517 Additionally, AT-RvD1 reduced cardiac fibrosis in our experimental model. This finding is  
518 consistent with that of a previous report showing that the administration of RvD1 to mice infected

519 with *T. cruzi* reduced cardiac fibrosis and transforming growth factor- $\beta$  (TGF- $\beta$ ) mRNA levels in  
520 the heart [19]. However, we used a 20-day continuous treatment scheme during the chronic stage of  
521 infection instead of the three-bolus scheme used by the previous investigators. In experimental  
522 models of myocardial infarction, RvD1 reduced the transcription of profibrotic genes and decreased  
523 collagen deposition, thereby reducing fibrosis and improving ventricular function [59]. The effect of  
524 AT-RvD1 on fibrosis is not dependent on FPR2 exclusively since the antifibrotic effect exerted by  
525 AT-RvD1 was not impaired in the FPR2<sup>-/-</sup> mice. Therefore, we propose that GPR32 may be  
526 necessary for this purpose, suggesting a level of redundancy within the resolution of the  
527 inflammation cascade.

528 An electrocardiographic analysis performed on the infected animals showed alterations in the QT  
529 interval in the WT mice, suggesting a slowdown in ventricular repolarization. This alteration  
530 appears early in patients with CCC and is a mortality predictor in patients with CD [60, 61].  
531 Although this QT interval alteration helped confirm the model's chronic nature, AT-RvD1 did not  
532 affect this disease pathology. A more prolonged observation period may be necessary to observe  
533 significant AT-RvD1-dependent changes in electrical cardiac function.

#### 534 AT-RvD1 reduces parasite load in *T. cruzi*-infected mice

535 Importantly, AT-RvD1 has no trypanocidal activity. However, we observed that AT-RvD1 alone or  
536 combined with Bz reduced the heart parasite load in infected mice. Studies in experimental CCC  
537 models have indicated that the administration of 15-epi-LXA<sub>4</sub> similarly reduces the parasite load of  
538 cardiac tissue in infected mice [24]. In the absence of FPR2, eliminating the parasite from cardiac  
539 tissue is not as efficient, suggesting that the pro-resolving cascade is essential for promoting  
540 parasite clearance. Probably, the anti-inflammatory effect of AT-RvD1 reduces the deleterious  
541 effect of the inflammatory environment that favors parasite persistence. The pro-resolving processes

542 initiated by AT-RvD1 enable the immune system to eliminate the parasites, probably because  
543 chronic inflammation is an evasive mechanism used by the parasites.

544 In conclusion, current drug therapies are ineffective in all phases of CD and they do not prevent  
545 long-term loss of heart function. Thus, the resolution of inflammation is advantageous as a  
546 pharmacological strategy for CCC. FPR2-dependent AT-RvD1 is a pro-resolving lipid mediator  
547 effective against inflammation, dampening pathological inflammatory responses and restoring  
548 tissue homeostasis; importantly, it contributes to clearing adverse inflammatory environments and  
549 allowing more efficient parasite elimination. Consequently, drug strategies aimed to modify host  
550 factors and resolve inflammation will improve specific antiparasitic drug therapy in the future.

#### 551 **Acknowledgments**

552 The authors wish to acknowledge grant funding from Agencia Nacional de Investigación y  
553 Desarrollo (ANID) FONDECYT grants 1210359 (JDM), 1190341 (UK), 1210627 (GD), 3210667  
554 (SF) and 3180452 (CC); BECAS ANID grant 21170501 (IC), 21170427 (FG) and 21170968 (HQ);  
555 Conselho Nacional de Desenvolvimento Científico e Tecnológico (CNPq: 305894/2018-8), and  
556 Fundação de Amparo a Pesquisa de Minas Gerais (Rede Mineira de Imunobiológicos, REDE-  
557 00140-16) (FSM). In addition, the authors wish to thank Dr. Jader Dos Santos Cruz from the  
558 Department of Biochemistry and Immunology, Institute of Biological Sciences, Federal University  
559 of Minas Gerais, Brazil, for performing the mouse electrocardiograms.

560

#### 561 **References:**

562 1. WHO. Chagas disease (also known as American trypanosomiasis). Fact Sheets: WHO  
563 2020: WHO 2020 [cited 2021 August 10]. Available from: [https://www.who.int/news-](https://www.who.int/news-room/fact-sheets/detail/chagas-disease-(american-trypanosomiasis))  
564 [room/fact-sheets/detail/chagas-disease-\(american-trypanosomiasis\)](https://www.who.int/news-room/fact-sheets/detail/chagas-disease-(american-trypanosomiasis)).

- 565 2. Coura JR. Chagas disease: what is known and what is needed--a background article. Mem  
566 Inst Oswaldo Cruz. 2007;102 Suppl 1:113-22.
- 567 3. Perez-Molina JA, Molina I. Chagas disease. Lancet. 2018;391(10115):82-94.
- 568 4. Echeverria LE, Morillo CA. American Trypanosomiasis (Chagas Disease). Infect Dis Clin  
569 North Am. 2019;33(1):119-34.
- 570 5. Rassi A, Jr., Marin JAN, Rassi A. Chronic Chagas cardiomyopathy: a review of the main  
571 pathogenic mechanisms and the efficacy of aetiological treatment following the  
572 BENznidazole Evaluation for Interrupting Trypanosomiasis (BENEFIT) trial. Mem Inst  
573 Oswaldo Cruz. 2017:0.
- 574 6. Acevedo GR, Girard MC, Gomez KA. The Unsolved Jigsaw Puzzle of the Immune  
575 Response in Chagas Disease. Front Immunol. 2018;9:1929.
- 576 7. Bonney KM, Luthringer DJ, Kim SA, Garg NJ, Engman DM. Pathology and Pathogenesis  
577 of Chagas Heart Disease. Annu Rev Pathol. 2019;14:421-47.
- 578 8. Serhan CN. Discovery of specialized pro-resolving mediators marks the dawn of resolution  
579 physiology and pharmacology. Mol Aspects Med. 2017;58:1-11.
- 580 9. Serhan CN, Arita M, Hong S, Gotlinger K. Resolvins, docosatrienes, and neuroprotectins,  
581 novel omega-3-derived mediators, and their endogenous aspirin-triggered epimers. Lipids.  
582 2004;39(11):1125-32.
- 583 10. Serhan CN, Levy BD. Resolvins in inflammation: emergence of the pro-resolving  
584 superfamily of mediators. J Clin Invest. 2018;128(7):2657-69.
- 585 11. Sun YP, Oh SF, Uddin J, Yang R, Gotlinger K, Campbell E, et al. Resolvin D1 and its  
586 aspirin-triggered 17R epimer. Stereochemical assignments, anti-inflammatory properties,  
587 and enzymatic inactivation. J Biol Chem. 2007;282(13):9323-34.
- 588 12. Serhan CN. Pro-resolving lipid mediators are leads for resolution physiology. Nature.  
589 2014;510(7503):92-101.

- 590 13. Lopez-Munoz RA, Molina-Berrios A, Campos-Estrada C, Abarca-Sanhueza P, Urrutia-  
591 Llancaqueo L, Pena-Espinoza M, et al. Inflammatory and Pro-resolving Lipids in  
592 Trypanosomatid Infections: A Key to Understanding Parasite Control. *Front Microbiol.*  
593 2018;9:1961.
- 594 14. Molina-Berrios A, Campos-Estrada C, Lapier M, Duaso J, Kemmerling U, Galanti N, et al.  
595 Protection of vascular endothelium by aspirin in a murine model of chronic Chagas' disease.  
596 *Parasitol Res.* 2013;112(7):2731-9.
- 597 15. Carvalho de Freitas R, Lonien SCH, Malvezi AD, Silveira GF, Wowk PF, da Silva RV, et  
598 al. *Trypanosoma cruzi*: Inhibition of infection of human monocytes by aspirin. *Exp*  
599 *Parasitol.* 2017;182:26-33.
- 600 16. Malvezi AD, Panis C, da Silva RV, de Freitas RC, Lovo-Martins MI, Tatakihara VL, et al.  
601 Inhibition of cyclooxygenase-1 and cyclooxygenase-2 impairs *Trypanosoma cruzi* entry  
602 into cardiac cells and promotes differential modulation of the inflammatory response.  
603 *Antimicrob Agents Chemother.* 2014;58(10):6157-64.
- 604 17. Carlo T, Kalwa H, Levy BD. 15-Epi-lipoxin A4 inhibits human neutrophil superoxide  
605 anion generation by regulating polyisoprenyl diphosphate phosphatase 1. *FASEB J.*  
606 2013;27(7):2733-41. doi: 10.1096/fj.12-223982.
- 607 18. Ogata H, Teixeira MM, Sousa RC, Silva MV, Correia D, Rodrigues Junior V, et al. Effects  
608 of aspirin-triggered resolvin D1 on peripheral blood mononuclear cells from patients with  
609 Chagas' heart disease. *Eur J Pharmacol.* 2016;777:26-32.
- 610 19. Horta AL, Williams T, Han B, Ma Y, Menezes APJ, Tu V, et al. Resolvin D1  
611 Administration Is Beneficial in *Trypanosoma cruzi* Infection. *Infect Immun.* 2020;88(6).  
612 doi: 10.1128/IAI.00052-20.
- 613 20. Pfaffl MW. A new mathematical model for relative quantification in real-time RT-PCR.  
614 *Nucleic Acids Res.* 2001;29(9):e45.

- 615 21. Soverow J, Hernandez S, Sanchez D, Forsyth C, Flores CA, Viana G, et al. Progression of  
616 Baseline Electrocardiogram Abnormalities in Chagas Patients Undergoing  
617 Antitrypanosomal Treatment. *Open Forum Infect Dis.* 2019;6(2):ofz012.
- 618 22. Marcolino MS, Palhares DM, Ferreira LR, Ribeiro AL. Electrocardiogram and Chagas  
619 disease: a large population database of primary care patients. *Glob Heart.* 2015;10(3):167-  
620 72.
- 621 23. Molina-Berrios A, Campos-Estrada C, Henriquez N, Faundez M, Torres G, Castillo C, et al.  
622 Protective role of acetylsalicylic acid in experimental *Trypanosoma cruzi* infection:  
623 evidence of a 15-epi-lipoxin A(4)-mediated effect. *PLoS Negl Trop Dis.* 2013;7(4):e2173.
- 624 24. Gonzalez-Herrera F, Cramer A, Pimentel P, Castillo C, Liempi A, Kemmerling U, et al.  
625 Simvastatin Attenuates Endothelial Activation through 15-Epi-Lipoxin A4 Production in  
626 Murine Chronic Chagas Cardiomyopathy. *Antimicrob Agents Chemother.* 2017;61(3).
- 627 25. Esper L, Roman-Campos D, Lara A, Brant F, Castro LL, Barroso A, et al. Role of SOCS2  
628 in modulating heart damage and function in a murine model of acute Chagas disease. *Am J*  
629 *Pathol.* 2012;181(1):130-40.
- 630 26. Canavaci AM, Sorgi CA, Martins VP, Morais FR, de Sousa EV, Trindade BC, et al. The  
631 acute phase of *Trypanosoma cruzi* infection is attenuated in 5-lipoxygenase-deficient mice.  
632 *Mediators Inflamm.* 2014;2014:893634.
- 633 27. Pavanelli WR, Gutierrez FR, Mariano FS, Prado CM, Ferreira BR, Teixeira MM, et al. 5-  
634 lipoxygenase is a key determinant of acute myocardial inflammation and mortality during  
635 *Trypanosoma cruzi* infection. *Microbes Infect.* 2010;12(8-9):587-97.
- 636 28. Cardillo F, de Pinho RT, Antas PR, Mengel J. Immunity and immune modulation in  
637 *Trypanosoma cruzi* infection. *Pathog Dis.* 2015;73(9):ftv082.
- 638 29. Ferreira BL, Ferreira ER, de Brito MV, Salu BR, Oliva MLV, Mortara RA, et al. BALB/c  
639 and C57BL/6 Mice Cytokine Responses to *Trypanosoma cruzi* Infection Are Independent  
640 of Parasite Strain Infectivity. *Front Microbiol.* 2018;9:553.

- 641 30. Roffe E, Rothfuchs AG, Santiago HC, Marino AP, Ribeiro-Gomes FL, Eckhaus M, et al.  
642 IL-10 limits parasite burden and protects against fatal myocarditis in a mouse model of  
643 *Trypanosoma cruzi* infection. *J Immunol.* 2012;188(2):649-60.
- 644 31. Tonelli RR, Torrecilhas AC, Jacysyn JF, Juliano MA, Colli W, Alves MJ. In vivo infection  
645 by *Trypanosoma cruzi*: the conserved FLY domain of the gp85/trans-sialidase family  
646 potentiates host infection. *Parasitology.* 2011;138(4):481-92.
- 647 32. Dutra WO, Menezes CA, Magalhaes LM, Gollob KJ. Immunoregulatory networks in  
648 human Chagas disease. *Parasite Immunol.* 2014;36(8):377-87.
- 649 33. Machado FS, Martins GA, Aliberti JC, Mestriner FL, Cunha FQ, Silva JS. *Trypanosoma*  
650 *cruzi*-infected cardiomyocytes produce chemokines and cytokines that trigger potent nitric  
651 oxide-dependent trypanocidal activity. *Circulation.* 2000;102(24):3003-8.
- 652 34. Chan CS, Ming-Lum A, Golds GB, Lee SJ, Anderson RJ, Mui AL. Interleukin-10 inhibits  
653 lipopolysaccharide-induced tumor necrosis factor- $\alpha$  translation through a SHIP1-  
654 dependent pathway. *J Biol Chem.* 2012;287(45):38020-7.
- 655 35. Reed SG, Brownell CE, Russo DM, Silva JS, Grabstein KH, Morrissey PJ. IL-10 mediates  
656 susceptibility to *Trypanosoma cruzi* infection. *J Immunol.* 1994;153(7):3135-40.
- 657 36. Anderson CF, Mendez S, Sacks DL. Nonhealing infection despite Th1 polarization  
658 produced by a strain of *Leishmania major* in C57BL/6 mice. *J Immunol.* 2005;174(5):2934-  
659 41.
- 660 37. Iyer SS, Cheng G. Role of interleukin 10 transcriptional regulation in inflammation and  
661 autoimmune disease. *Crit Rev Immunol.* 2012;32(1):23-63.
- 662 38. Vasconcelos RH, Azevedo Ede A, Diniz GT, Cavalcanti Mda G, de Oliveira W, Jr., de  
663 Morais CN, et al. Interleukin-10 and tumour necrosis factor- $\alpha$  serum levels in chronic  
664 Chagas disease patients. *Parasite Immunol.* 2015;37(7):376-9.

- 665 39. Sousa GR, Gomes JA, Fares RC, Damasio MP, Chaves AT, Ferreira KS, et al. Plasma  
666 cytokine expression is associated with cardiac morbidity in chagas disease. *PLoS One*.  
667 2014;9(3):e87082.
- 668 40. Gomes JA, Bahia-Oliveira LM, Rocha MO, Busek SC, Teixeira MM, Silva JS, et al. Type 1  
669 chemokine receptor expression in Chagas' disease correlates with morbidity in cardiac  
670 patients. *Infect Immun*. 2005;73(12):7960-6.
- 671 41. Salas-Hernandez A, Espinoza-Perez C, Vivar R, Espitia-Corredor J, Lillo J, Parra-Flores P,  
672 et al. Resolvin D1 and E1 promote resolution of inflammation in rat cardiac fibroblast in  
673 vitro. *Mol Biol Rep*. 2021;48(1):57-66.
- 674 42. Chen J, Shetty S, Zhang P, Gao R, Hu Y, Wang S, et al. Aspirin-triggered resolvin D1  
675 down-regulates inflammatory responses and protects against endotoxin-induced acute  
676 kidney injury. *Toxicol Appl Pharmacol*. 2014;277(2):118-23.
- 677 43. Bento AF, Claudino RF, Dutra RC, Marcon R, Calixto JB. Omega-3 fatty acid-derived  
678 mediators 17(R)-hydroxy docosahexaenoic acid, aspirin-triggered resolvin D1 and resolvin  
679 D2 prevent experimental colitis in mice. *J Immunol*. 2011;187(4):1957-69.
- 680 44. Lee HN, Kundu JK, Cha YN, Surh YJ. Resolvin D1 stimulates efferocytosis through  
681 p50/p50-mediated suppression of tumor necrosis factor-alpha expression. *J Cell Sci*.  
682 2013;126(Pt 17):4037-47.
- 683 45. Gao Y, Zhang H, Luo L, Lin J, Li D, Zheng S, et al. Resolvin D1 Improves the Resolution  
684 of Inflammation via Activating NF-kappaB p50/p50-Mediated Cyclooxygenase-2  
685 Expression in Acute Respiratory Distress Syndrome. *J Immunol*. 2017.
- 686 46. Fredman G, Ozcan L, Spolitu S, Hellmann J, Spite M, Backs J, et al. Resolvin D1 limits 5-  
687 lipoygenase nuclear localization and leukotriene B4 synthesis by inhibiting a calcium-  
688 activated kinase pathway. *Proc Natl Acad Sci U S A*. 2014;111(40):14530-5.
- 689 47. Piaggio E, Sanceau J, Revelli S, Bottasso O, Wietzerbin J, Serra E. Trypanocidal drug  
690 benznidazole impairs lipopolysaccharide induction of macrophage nitric oxide synthase



- 691 gene transcription through inhibition of NF-kappaB activation. *J Immunol.*  
692 2001;167(6):3422-6.
- 693 48. Cevey AC, Mirkin GA, Penas FN, Goren NB. Low-dose benznidazole treatment results in  
694 parasite clearance and attenuates heart inflammatory reaction in an experimental model of  
695 infection with a highly virulent *Trypanosoma cruzi* strain. *Int J Parasitol Drugs Drug Resist.*  
696 2016;6(1):12-22.
- 697 49. Garcia S, Ramos CO, Senra JF, Vilas-Boas F, Rodrigues MM, Campos-de-Carvalho AC, et  
698 al. Treatment with benznidazole during the chronic phase of experimental Chagas' disease  
699 decreases cardiac alterations. *Antimicrob Agents Chemother.* 2005;49(4):1521-8.
- 700 50. Cevey AC, Penas FN, Alba Soto CD, Mirkin GA, Goren NB. IL-10/STAT3/SOCS3 Axis Is  
701 Involved in the Anti-inflammatory Effect of Benznidazole. *Front Immunol.* 2019;10:1267.  
702 doi: 10.3389/fimmu.2019.01267.
- 703 51. Ribeiro CM, Budni P, Pedrosa RC, Farias MS, Parisotto EB, Dalmarco EM, et al.  
704 Antioxidant therapy attenuates oxidative insult caused by benznidazole in chronic Chagas'  
705 heart disease. *Int J Cardiol.* 2010;145(1):27-33.
- 706 52. Hall BS, Wilkinson SR. Activation of benznidazole by trypanosomal type I nitroreductases  
707 results in glyoxal formation. *Antimicrob Agents Chemother.* 2012;56(1):115-23.
- 708 53. Morillo CA, Marin-Neto JA, Avezum A, Sosa-Estani S, Rassi A, Jr., Rosas F, et al.  
709 Randomized Trial of Benznidazole for Chronic Chagas' Cardiomyopathy. *N Engl J Med.*  
710 2015;373(14):1295-306.
- 711 54. Echeverria LE, Rojas LZ, Calvo LS, Roa ZM, Rueda-Ochoa OL, Morillo CA, et al. Profiles  
712 of cardiovascular biomarkers according to severity stages of Chagas cardiomyopathy. *Int J*  
713 *Cardiol.* 2017;227:577-82.
- 714 55. Tucci AR, Oliveira FOR, Jr., Lechuga GC, Oliveira GM, Eleuterio AC, Mesquita LB, et al.  
715 Role of FAK signaling in chagasic cardiac hypertrophy. *Braz J Infect Dis.* 2020;24(5):386-  
716 97.

- 717 56. Corral RS, Guerrero NA, Cuervo H, Girones N, Fresno M. Trypanosoma cruzi infection  
718 and endothelin-1 cooperatively activate pathogenic inflammatory pathways in  
719 cardiomyocytes. PLoS Negl Trop Dis. 2013;7(2):e2034.
- 720 57. Petersen CA, Burleigh BA. Role for interleukin-1 beta in Trypanosoma cruzi-induced  
721 cardiomyocyte hypertrophy. Infect Immun. 2003;71(8):4441-7.
- 722 58. Pirault J, Back M. Lipoxin and Resolvin Receptors Transducing the Resolution of  
723 Inflammation in Cardiovascular Disease. Front Pharmacol. 2018;9:1273.
- 724 59. Kain V, Ingle KA, Colas RA, Dalli J, Prabhu SD, Serhan CN, et al. Resolvin D1 activates  
725 the inflammation resolving response at splenic and ventricular site following myocardial  
726 infarction leading to improved ventricular function. J Mol Cell Cardiol. 2015;84:24-35.
- 727 60. Salles G, Xavier S, Sousa A, Hasslocher-Moreno A, Cardoso C. Prognostic value of QT  
728 interval parameters for mortality risk stratification in Chagas' disease: results of a long-term  
729 follow-up study. Circulation. 2003;108(3):305-12.
- 730 61. Eickhoff CS, Lawrence CT, Sagartz JE, Bryant LA, Labovitz AJ, Gala SS, et al. ECG  
731 detection of murine chagasic cardiomyopathy. J Parasitol. 2010;96(4):758-64.
- 732
- 733
- 734
